# Supplementary material
Source: PubMed Central journal article supplement (PMC301407)
Supplement: plntcell_16_1_229__1.pdf [file plntcell_16_1_229__1.pdf]

| <b>AGI number</b> | <b>PCR primer sequence</b>      |
|-------------------|---------------------------------|
| At1g05840         | TGCTACCAGATTAGTGGTGGTCCTC       |
| At1g09790         | CTACATCCGTGTCCCCGACTAAGTT       |
| At1g18280         | TTGAATGAGATCGTAGCCAAAGACG       |
| At1g24520         | GTGGCTGGTCTCTAGGAAGTGAC         |
| At1g48940         | CTTTAACCAATGGGCTTCCAAGAAC       |
| At1g54860         | TGATTTCCACTTGTGTTGTCTCCAA       |
| At1g55330         | GATGATGGTGTATTATTATGGTTGTGCGGTG |
| At1g56320         | TGCTCTTTGATAGTCAGAGACATTCAG     |
| At1g64760         | TGACTAGTTACGACCGAGCCAAAGA       |
| At1g65240         | TAAAGGAGGTGGGATTTTGTCTGTT       |
| At1g70170         | GCGTTAAACTTCACTCTTCCGAGTC       |
| At1g77780         | CTCGTGCTTATAACCAGGGTTG          |
| At2g19440         | CTTTGGTTTTGTTGATCGCTGGA         |
| At2g20700         | CGGTTCTTCTACCTTCCCTCGTTCT       |
| At2g24450         | CTGCATCTGCACCATCAGAAAGT         |
| At2g46330         | ACCGGATTTCGCGTTGTTTCAGTTTTGTA   |
| At3g01700         | ACGACTAATGTGAAGCTCTCCATCG       |
| At3g02740         | TGGAGCAATCTATACTGTTGGTGCT       |
| At3g04010         | GCTAAAGATTGGGTCCAAAGAAACG       |
| At3g07390         | TCCGGTACTCAATTCCTACCTCCAT       |
| At3g12660         | CAGCTTCAAGACACTGTAGCAGCAC       |
| At3g16860         | ACGAGCAACAGTCACAGGAAACAT        |
| At3g18590         | CTCTTGGAGATGCGTTTAAACCAATG      |
| At3g20580         | CACCAAGAAAAACATCAAAGGACTGA      |
| At3g20865         | GAAGAACATCTTTGTGGCCCTCTTT       |
| At3g26110         | TATAGCAGAGGGTCCAGCTGATGAC       |
| At3g27410         | TCTAGCTCCGCCTCTAGATCTTCTTC      |
| At3g57690         | TCCCTTGTCTCCCTCTTCAGCTACT       |
| At3g58100         | GTTATGGTGTGTGGCGAAGAACAAC       |
| At3g61980         | ACGTATGCCCTCGGGTTAAGGAT         |
| At4g08670         | AAATGGGAATTGAACTGAATAGCACA      |
| At4g16140         | GTCTCCACCTCCTAGCTCCAGT          |
| At4g27110         | TGCAGTCGGTTATCTCGTTTAAAGAAG     |
| At4g28100         | GAATCTTGAAAAAGAATGCCGGAAC       |
| At4g28280         | TTTTGTCTGGATTTCGCTTCTCTCAT      |
| At5g14380         | CTAAGTTCTCTGTTGTCGGCACAGTC      |
| At5g20230         | GAGAAAGAGAAACCCATTAGCCACAT      |
| At5g36260         | ACCTATTGACCTTCCACCAAGTCTA       |
| At5g40730         | ATGTTTGTTCAGATCGCTGTGGTTT       |
| At5g49270         | GAGATAGATTTTCCCAACTGGTTCC       |
| At5g51480         | AATGGACAGTTGATACTAATTTTCAGCA    |
| At5g53250         | CCGATTGCTCAATCTCATTCTTCTTC      |
| At5g58050         | GAAGTGAAGGTGGTCCGCCACAAA        |
| At5g58170         | CAACTGGAGGAGCTCAGTCACATC        |
| At5g58480         | AAGTTCTCCGAGCTCTCTCTGGTTC       |
| At5g60490         | GGATGACAGTGATAGTTCCAGTGATG      |
| At5g64790         | CGTAGTGAACAAAGACACGGTCAATC      |
